# Supplementary material for: Biochemical characterization of the Lassa virus L protein
Source: PubMed Central journal article supplement (PMC6527160; doi:10.1074/jbc.ra118.006973), 2019-03-29
Supplement: supp_RA118.006973_142331_1_supp_307471_pp2wq1.pdf [file supp_RA118.006973_142331_1_supp_307471_pp2wq1.pdf]

**SUPPORTING INFORMATION**

Biochemical characterization of the Lassa virus L protein

**Dominik Vogel<sup>1,#</sup>, Maria Rosenthal<sup>1,#</sup>, Nadja Gogrefe<sup>1</sup>, Sophia Reindl<sup>1,\*</sup>, Stephan Günther<sup>1,2,\*</sup>**

Material included: Figure S1  
Figure S2  
Figure S3  
Figure S4  
Figure S5

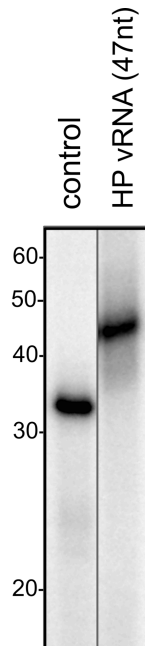

| length<br>[nt] | identifier | sequence |
|----------------|------------|----------|
|----------------|------------|----------|

|    |         |                                                                 |
|----|---------|-----------------------------------------------------------------|
| 47 | HP vRNA | 5' HO- GCGCACC GGGGAUCCUAGGCAUUUUUAUAGCCUAGGAUCCACUGUGCG -OH 3' |
|----|---------|-----------------------------------------------------------------|

**Figure S1. A hairpin RNA template leads to a product of the expected length.** Purified LASV L protein Strep407 was either pre-incubated with the standard vRNA template used throughout the study, i.e. the conserved 19-nt 5'-end with an additional 5'G residue, followed by addition of the 19-nt 3' genome end (control), or a 47-nt hairpin RNA template containing the terminal 19 nt of 3' and 5' vRNA ends including the additional 5'G residue connected by a linker sequence (HP vRNA). Reactions were carried out in presence of NTPs supplemented with  $[\alpha]^{32}\text{P}$ -GTP for 30 min at 30°C. Products were separated by denaturing gel electrophoresis and visualized by autoradiography. Both lanes originate from the same gel and have been cut for presentation reasons.

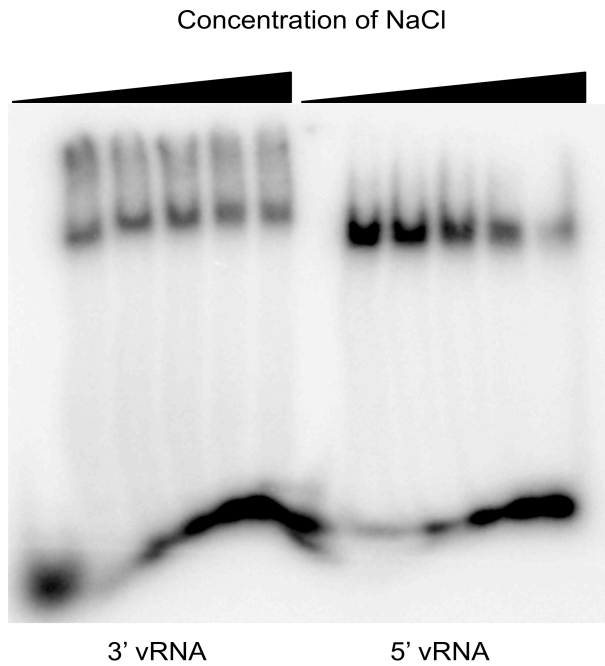

**Figure S2. Exemplary gel image for Figure 3C.**

RNA binding of LASV L protein Strep407 to the 5' and 3' RNA (see Tab. 1) was determined by an electrophoretic mobility shift assay (EMSA). 0.6  $\mu$ M of L protein was incubated in a 1:1 ratio with RNA at increasing NaCl concentrations (50 to 1050 mM). The protein-RNA complex was separated from the free RNA by native PAGE and visualized by phosphor screen autoradiography using a Typhoon scanner (GE Healthcare).

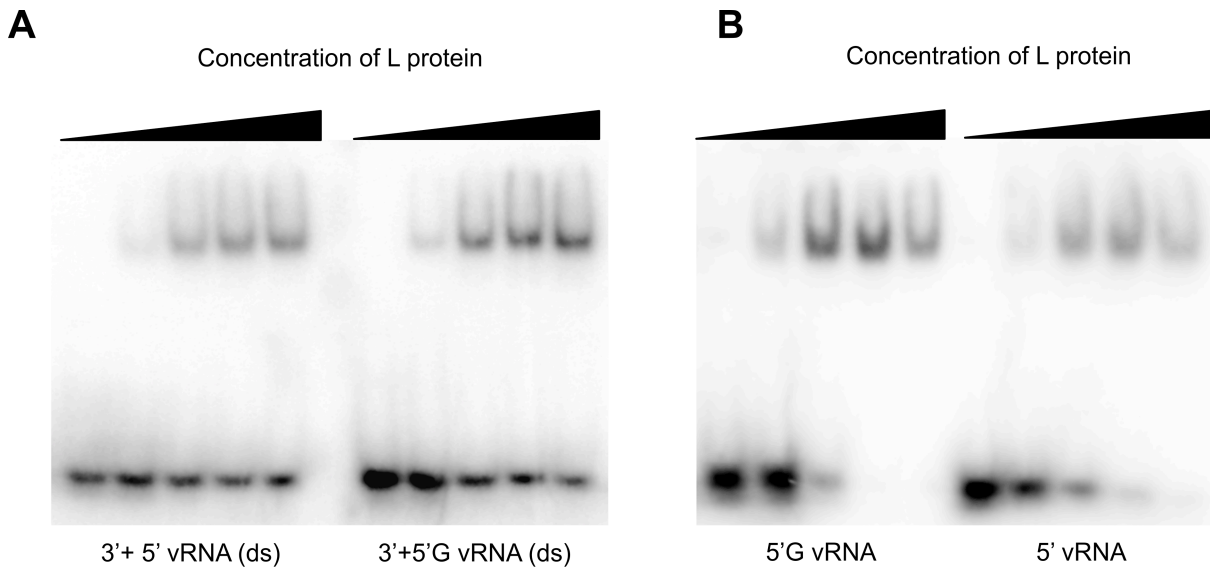

**Figure S3. Exemplary gel image for Figures 4C and D.**

Binding affinities of the LASV L protein Strep407 to **(A)** the double stranded vRNA promoter (ds) or **(B)** the single stranded 5'-end, respectively, with and without the additional G were analyzed by EMSAs. Increasing amounts of L protein (0 to 1  $\mu$ M) were incubated with 0.6  $\mu$ M of the indicated RNA (see Tab. 1). The protein-RNA complex was separated from the free RNA by native PAGE and visualized by phosphor screen autoradiography using a Typhoon scanner (GE Healthcare).

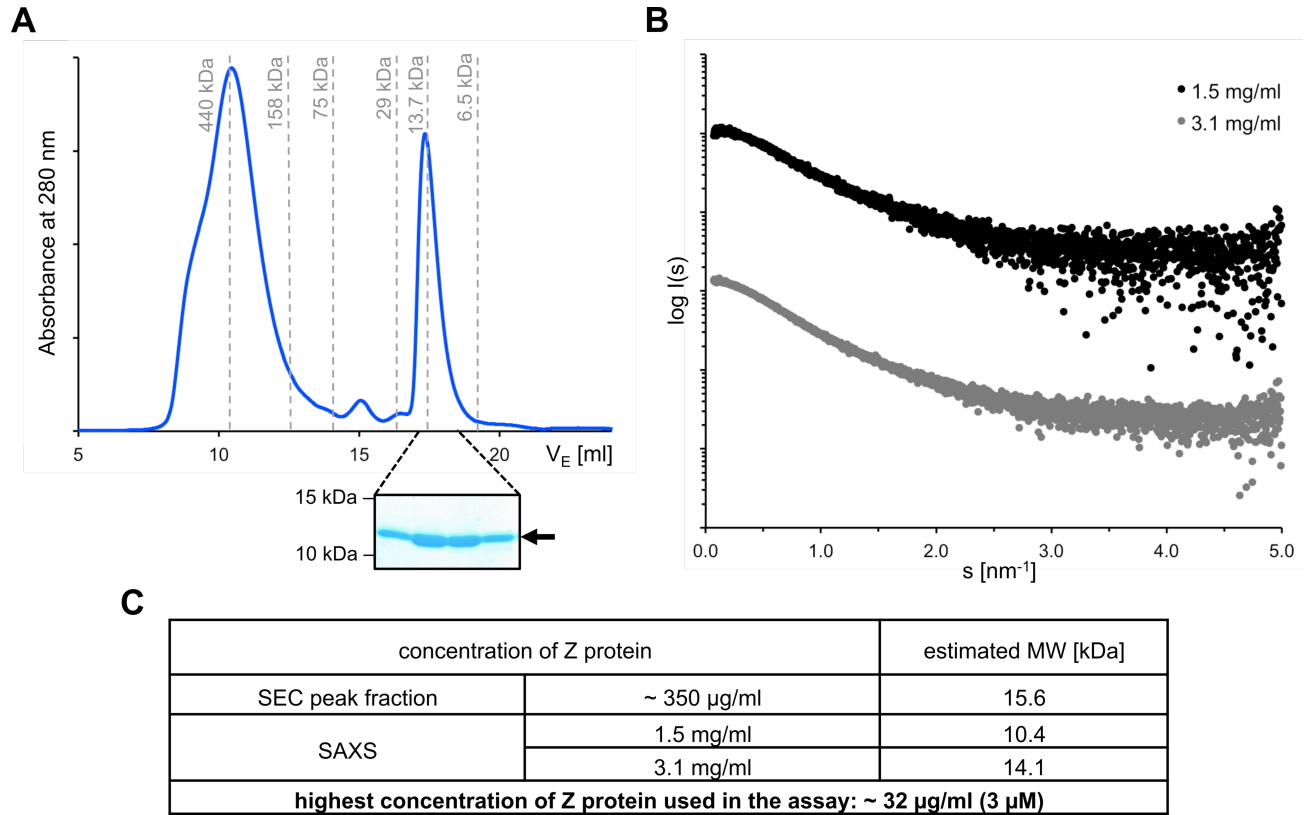

**Figure S4. Confirmation of the monomeric state of LASV Z protein.**

(A) Size exclusion chromatography (SEC) of LASV Z protein displays two large peaks, representing monomeric and dodecameric Z protein, respectively. Coomassie stained SDS-PAGE analysis of fractions of the second large peak prove the presence of monomeric Z protein. Elution volumes of standard proteins (with sizes between 6.5 and 440 kDa) for column calibration are indicated. (B) Experimental SAXS scattering profiles of LASV Z protein at 1.5 mg/ml (black) and 3.1 mg/ml (grey) are presented. (C) Comparison of molecular weight estimations of the Z protein extracted from SEC and SAXS measurements at different concentrations with the concentration of Z protein used in the polymerase assay.

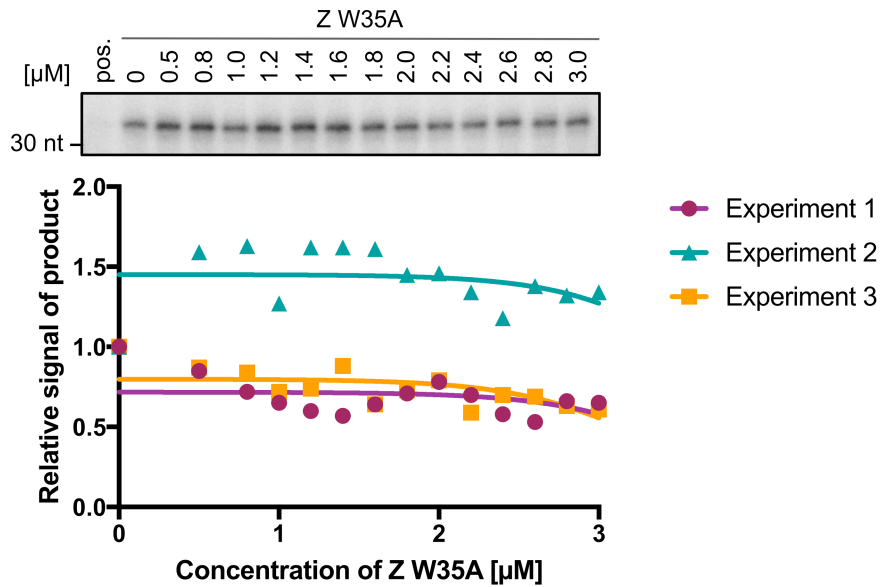

**Figure S5. Test of the inhibitory effect of Z protein mutant W35A on L protein activity.**

Inhibition of RNA synthesis activity of the LASV L protein by the LASV Z W35A protein. 1  $\mu\text{M}$  of Strep407 L protein was incubated with 3  $\mu\text{M}$  of wild-type Z protein (pos.), or the indicated amounts of Z W35A. RNA bands were quantified and normalized to the sample without Z protein. Individual experiments are shown, for each of which a dose response curve was fitted to the data. The parallel shift of the single curves is due to regular experimental variation in the first data point (sample without Z protein).
